# Supplementary figures and images for: Narcissism in patients admitted to psychiatric acute wards: its relation to violence, suicidality and other psychopathology
Source: Springer Nature journal article supplement (doi:10.1186/1471-244x-8-13), 2008-02-27

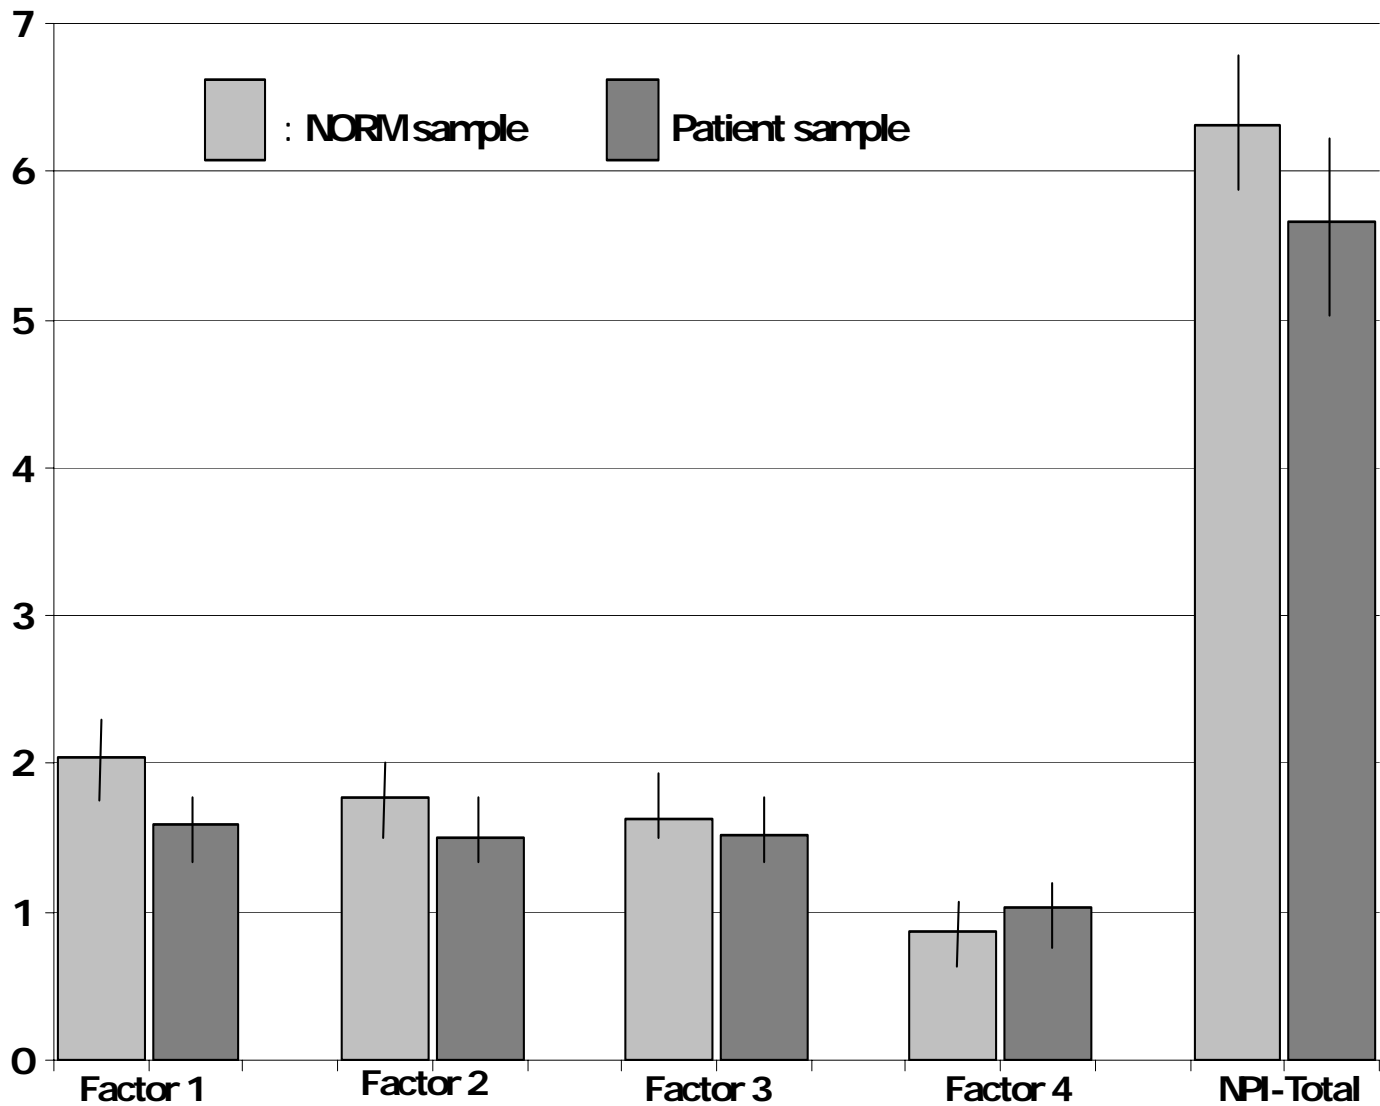

Supplement: 12888_2007_457_MOESM1_ESM.pdf [file 12888_2007_457_MOESM1_ESM.pdf]
